# Supplementary material for: Emission Characteristics of Air Pollutants and CO2 from 11 Cities with Different Economic Development around the Bohai Sea in China from 2008–2017
Source: MDPI journal article supplement (doi:10.3390/toxics10090547), 2022-09-19
Supplement: s1 [file s1]

# Supplementary Materials: Emission Characteristics of Air Pollutants and CO<sub>2</sub> from 11 Cities with Different Economic Development around the Bohai Sea in China from 2008–2017

Zongshan Zhao, Qingyang Liu, Jing Lan and Yaru Li

**Table S1.** The summary of the annual level of air pollutants (Metric kilotonnes) of the industry sector and CO<sub>2</sub> of the industry sector.

| City        | BC      | CO       | CO <sub>2</sub> | NH <sub>3</sub> | NO <sub>x</sub> | OC      | PM <sub>2.5</sub> | PM <sub>10</sub> | SO <sub>2</sub> |
|-------------|---------|----------|-----------------|-----------------|-----------------|---------|-------------------|------------------|-----------------|
| Beijing     | 3.8–4.9 | 940–1336 | 54–87           | /               | 33–65           | 1.8–3.8 | 10–22             | 16–36            | 6–39            |
| Tianjin     | 2.2–3.8 | 811–1278 | 52–71           | /               | 83–112          | 1.3–2.5 | 11–18             | 18–30            | 33–127          |
| Dalian      | 2.5–4.4 | 329–644  | 33–36           | /               | 53–66           | 2.6–5.9 | 15–34             | 40–83            | 40–85           |
| Yingkou     | 1.9–3.4 | 77–119   | 8–12            | /               | 11–15           | 1.5–3.1 | 2.2–5.1           | 4.8–11.8         | 15–39           |
| Jinzhou     | 2.6–3.0 | 98–116   | 10–11           | /               | 32–35           | 2.3–2.6 | 10–13             | 13–16            | 31–39           |
| Panjin      | 0.4–0.8 | 6–10     | 0.8–0.9         | /               | 3.6–4.5         | 0.3–0.8 | 1.1–2.9           | 1.4–3.9          | 5–20            |
| Qinhuangdao | 1.7–2.8 | 176–232  | 23–25           | /               | 36–39           | 1.5–2.5 | 6–13              | 8–20             | 17–47           |
| Tangshan    | 3.0–5.0 | 760–1180 | 71–81           | /               | 79–130          | 2.4–4.2 | 28–51             | 36–69            | 120–167         |
| Dongying    | 2.5–4.4 | 284–445  | 21–28           | /               | 12–17           | 2.2–4.1 | 14–25             | 18–34            | 18–67           |
| Weifang     | 0.9–1.8 | 226–300  | 15–24           | /               | 24–42           | 0.3–0.9 | 6–13              | 9–21             | 39–107          |
| Yantai      | 2.3–4.6 | 184–390  | 30–32           | /               | 36–45           | 1.8–4.4 | 10–23             | 14–31            | 39–74           |

**Table S2.** The summary of the annual level of air pollutants (kg per capita) per capita and CO<sub>2</sub> (tonnes per capita) per capita.

| City        | BC      | CO      | CO <sub>2</sub> | NH <sub>3</sub> | NO <sub>x</sub> | OC      | PM <sub>2.5</sub> | PM <sub>10</sub> | SO <sub>2</sub> |
|-------------|---------|---------|-----------------|-----------------|-----------------|---------|-------------------|------------------|-----------------|
| Beijing     | 0.4–0.7 | 80–151  | 5.7–7.0         | 1.8–2.1         | 4.2–10          | 0.5–1.0 | 0.8–2.3           | 1.2–3.1          | 0.9–6.8         |
| Tianjin     | 0.4–0.9 | 126–258 | 9.4–10          | 2.2–3.1         | 15–26           | 0.5–1.4 | 1.6–3.4           | 2.2–4.8          | 5.2–7.9         |
| Dalian      | 1.0–2.0 | 80–183  | 11–14           | 3.8–6.7         | 17–35           | 1.0–2.3 | 2.9–7.5           | 3.5–9.5          | 8–24            |
| Yingkou     | 2.1–2.8 | 84–102  | 8–15            | 4.8–8.4         | 15–18           | 2.0–3.2 | 3.9–9.2           | 4.5–10.7         | 11–38           |
| Jinzhou     | 1.9–2.4 | 82–95   | 9–10            | 5.1–6.0         | 27–39           | 2.4–3.0 | 4.8–6.7           | 5.5–7.8          | 24–29           |
| Panjin      | 1.0–1.5 | 18–24   | 5–8             | 8.0–10          | 20–30           | 1.1–2.0 | 3.1–5.1           | 3.7–6.0          | 16–36           |
| Qinhuangdao | 1.5–2.0 | 156–204 | 12–24           | 4.1–5.6         | 26–32           | 1.4–2.3 | 3.1–6.2           | 4.1–8.7          | 7–22            |
| Tangshan    | 1.2–1.8 | 282–402 | 21–25           | 6.6–7.6         | 30–53           | 1.8–3.0 | 7.3–12            | 8.1–14           | 25–38           |
| Dongying    | 3.1–4.7 | 255–396 | 21–29           | 15–17           | 16–23           | 4.0–6.9 | 11–19             | 13–24            | 18–55           |
| Weifang     | 0.5–0.8 | 77–124  | 4.4–6.0         | 3.0–3.7         | 10–14           | 0.5–1.0 | 2.4–4.2           | 2.9–5.3          | 6–17            |
| Yantai      | 0.9–1.4 | 75–125  | 7.9–9.3         | 3.4–4.0         | 11–16           | 1.1–1.9 | 2.8–5.1           | 3.3–6.3          | 7–15            |

**Table S3.** The summary of the annual concentration of air pollutants (kg per capita) of the industry sector per capita and CO<sub>2</sub> (tonnes per capita) of the industry sector per capita.

| City        | BC      | CO      | CO <sub>2</sub> | NH <sub>3</sub> | NO <sub>x</sub> | OC      | PM <sub>2.5</sub> | PM <sub>10</sub> | SO <sub>2</sub> |
|-------------|---------|---------|-----------------|-----------------|-----------------|---------|-------------------|------------------|-----------------|
| Beijing     | 0.1–0.3 | 30–80   | 2–4             | 1–2             | 2–4             | 0.2–0.4 | 0.4–0.8           | 0.6–1.0          | 0.4–1.8         |
| Tianjin     | 0.1–0.4 | 40–90   | 4–6             | 1–2             | 4–6             | 0.5–1.4 | 0.9–1.1           | 1.1–1.3          | 2–4             |
| Dalian      | 0.3–0.6 | 40–90   | 4–6             | 2–3             | 4–6             | 0.4–1   | 0.6–0.9           | 0.8–1.2          | 3–5             |
| Yingkou     | 0.6–1.1 | 40–80   | 4–7             | 2–3             | 4–6             | 1–2     | 0.7–1.1           | 0.9–1.3          | 5–8             |
| Jinzhou     | 0.4–0.8 | 40–80   | 4–5             | 2–4             | 4–8             | 1–2     | 2–5               | 3–6              | 5–9             |
| Panjin      | 0.3–0.8 | 30–60   | 3–5             | 2–5             | 4–8             | 0.4–1   | 2–5               | 3–6              | 6–8             |
| Qinhuangdao | 0.3–0.5 | 50–90   | 5–6             | 2–4             | 3–6             | 1.5–2   | 2–5               | 3–6              | 3–8             |
| Tangshan    | 0.7–0.9 | 90–150  | 5–6             | 2–5             | 5–9             | 2–3     | 5–8               | 6–9              | 6–12            |
| Dongying    | 0.9–1.3 | 100–160 | 5–6             | 3–6             | 3–6             | 2–3     | 4–7               | 5–8              | 7–14            |
| Weifang     | 0.2–0.4 | 40–90   | 3–5             | 1–2             | 3–5             | 0.2–0.4 | 0.4–0.8           | 0.5–0.9          | 3–7             |
| Yantai      | 0.2–0.5 | 40–90   | 5–6             | 1–2             | 3–5             | 0.2–0.4 | 0.4–0.8           | 0.5–0.9          | 3–8             |

**Table S4.** Correlation (Pearson's r) between economic development metrics including GDP, GDP per capita, GDP of industry sector, and GDP per capita of industry sector with air pollution, as well as CO<sub>2</sub> emission.

| Item              | GDP     | GDP of the industry sector | Item                         | GDP per capita | GDP per capita of the industry sector |
|-------------------|---------|----------------------------|------------------------------|----------------|---------------------------------------|
| BC                | 0.509** | 0.448**                    | BC per capita                | 0.330**        | 0.588**                               |
| CO                | 0.566** | 0.787**                    | CO per capita                | 0.291**        | 0.602**                               |
| CO <sub>2</sub>   | 0.645** | 0.860**                    | CO <sub>2</sub> per capita   | 0.509**        | 0.583**                               |
| NH <sub>3</sub>   | 0.507** | /                          | NH <sub>3</sub> per capita   | 0.509**        | /                                     |
| NO <sub>x</sub>   | 0.337*  | 0.643**                    | NO <sub>x</sub> per capita   | -0.130         | 0.050**                               |
| OC                | 0.483** | 0.216**                    | OC per capita                | 0.409**        | 0.601**                               |
| PM <sub>2.5</sub> | 0.225*  | 0.440**                    | PM <sub>2.5</sub> per capita | 0.424**        | 0.693**                               |
| PM <sub>10</sub>  | 0.871** | 0.500**                    | PM <sub>10</sub> per capita  | 0.424**        | 0.664**                               |
| SO <sub>2</sub>   | 0.317*  | 0.441**                    | SO <sub>2</sub> per capita   | 0.330*         | 0.504**                               |

\*p &lt; 0.05, \*\* p &lt; 0.001.

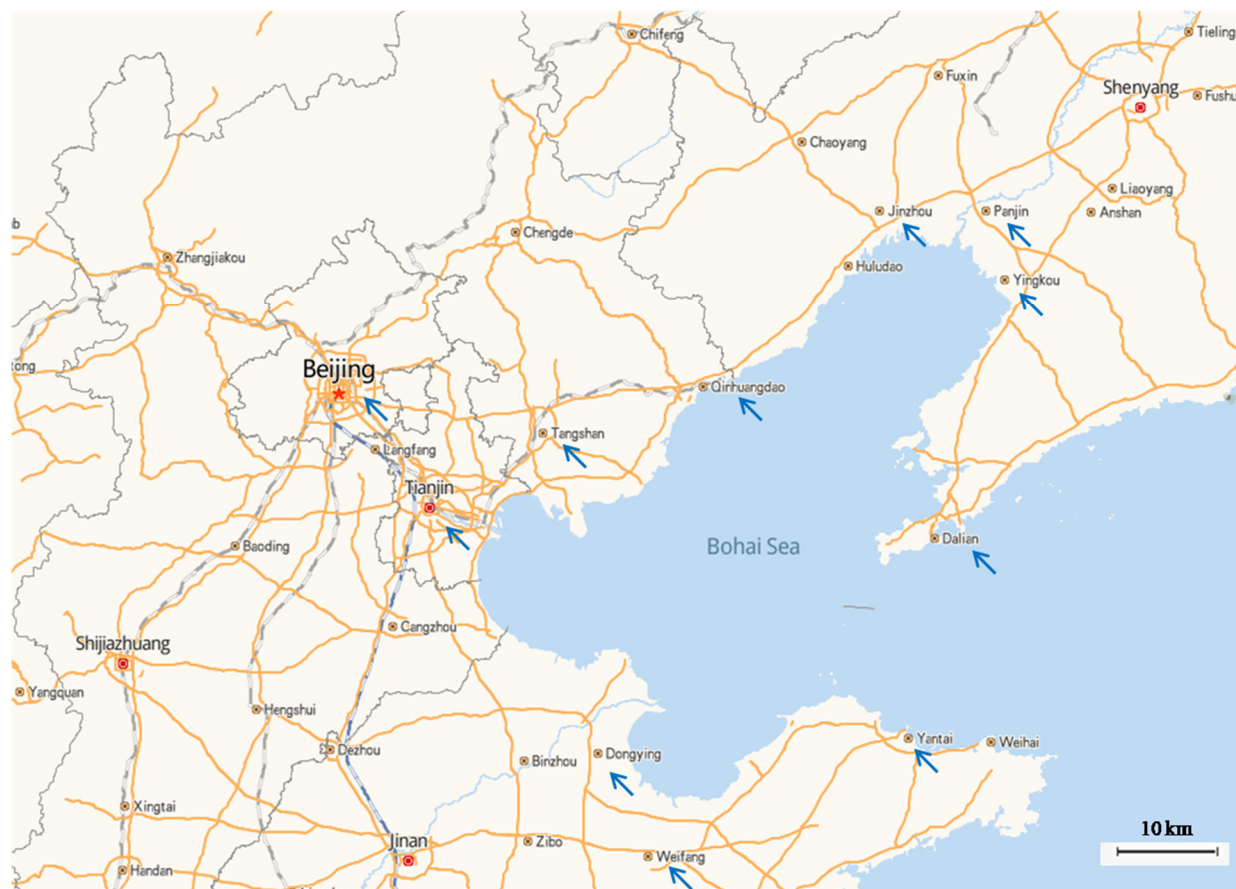

**Figure S1.** The sketch map for the locations of the eleven cities.

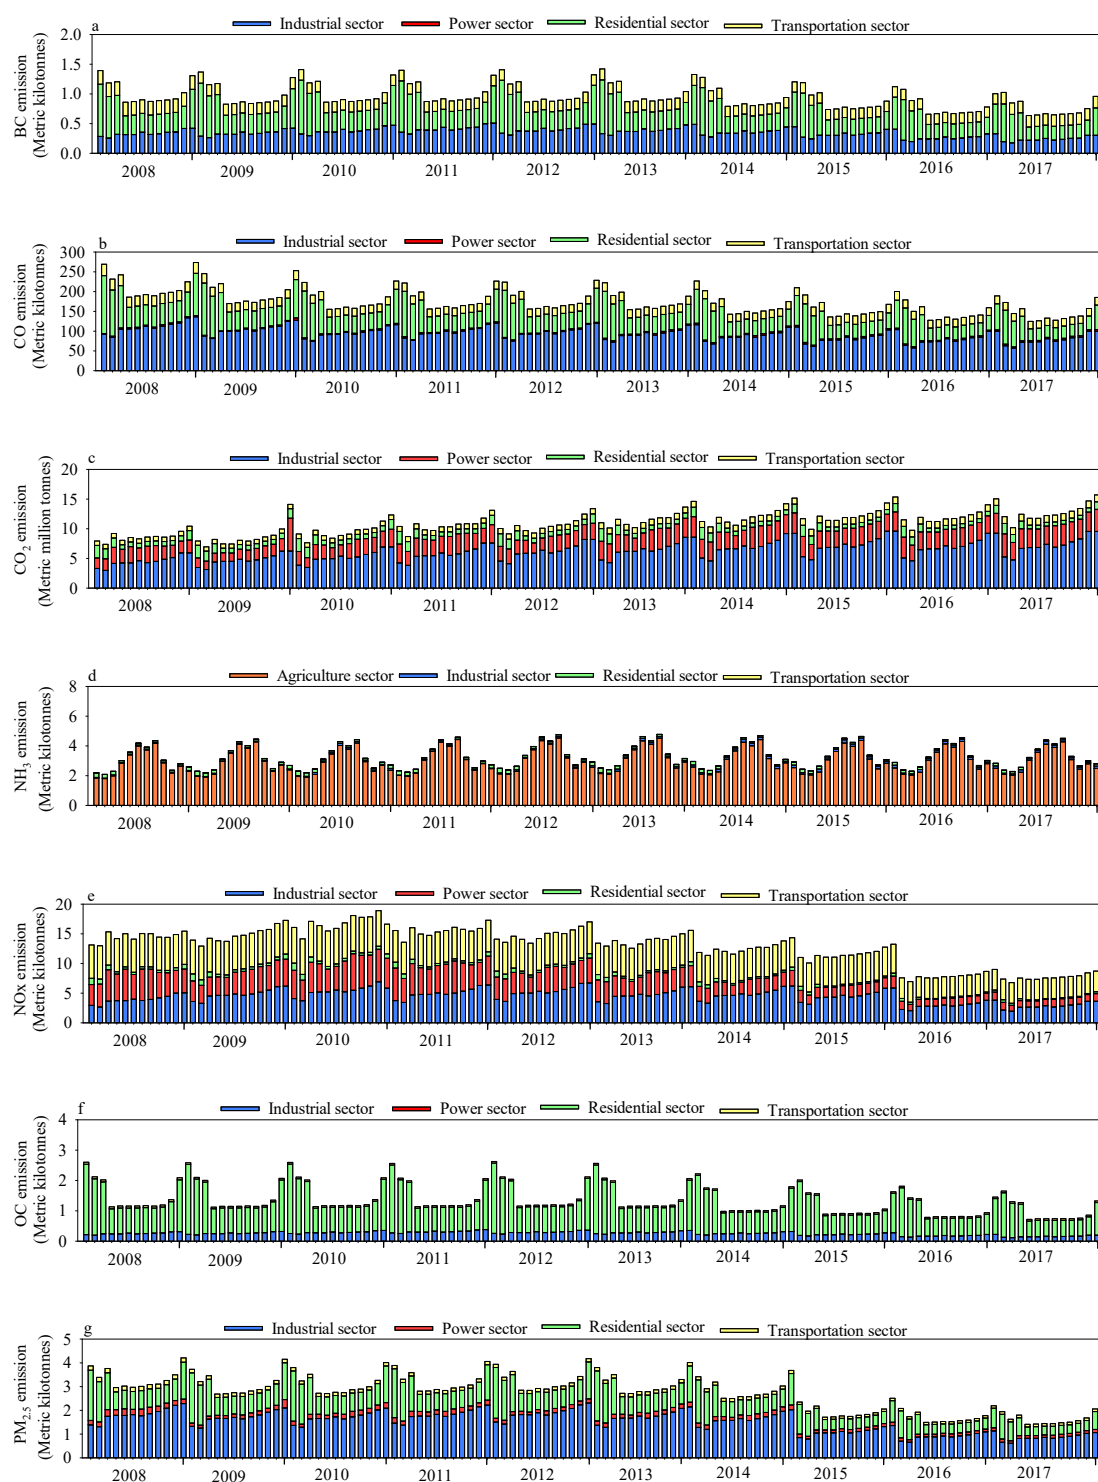

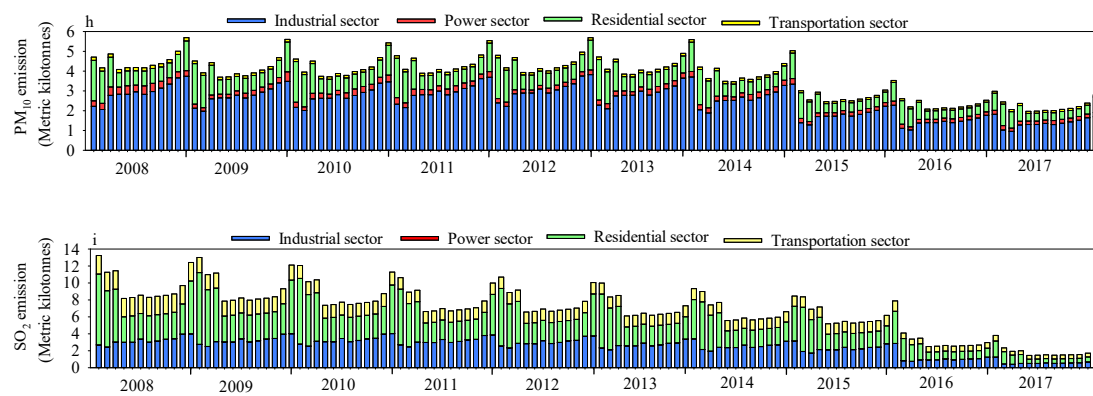

**Figure S2.** Monthly trends in emissions of air pollutants including BC by sector (a), CO by sector (b), NH<sub>3</sub> by sector (d), NO<sub>x</sub> by sector (e), OC by sector (f), PM<sub>2.5</sub> by sector (g), PM<sub>10</sub> by sector (h), SO<sub>2</sub> by sector (i), as well as CO<sub>2</sub> by sector (c) in Beijing from the years of 2008–2017.

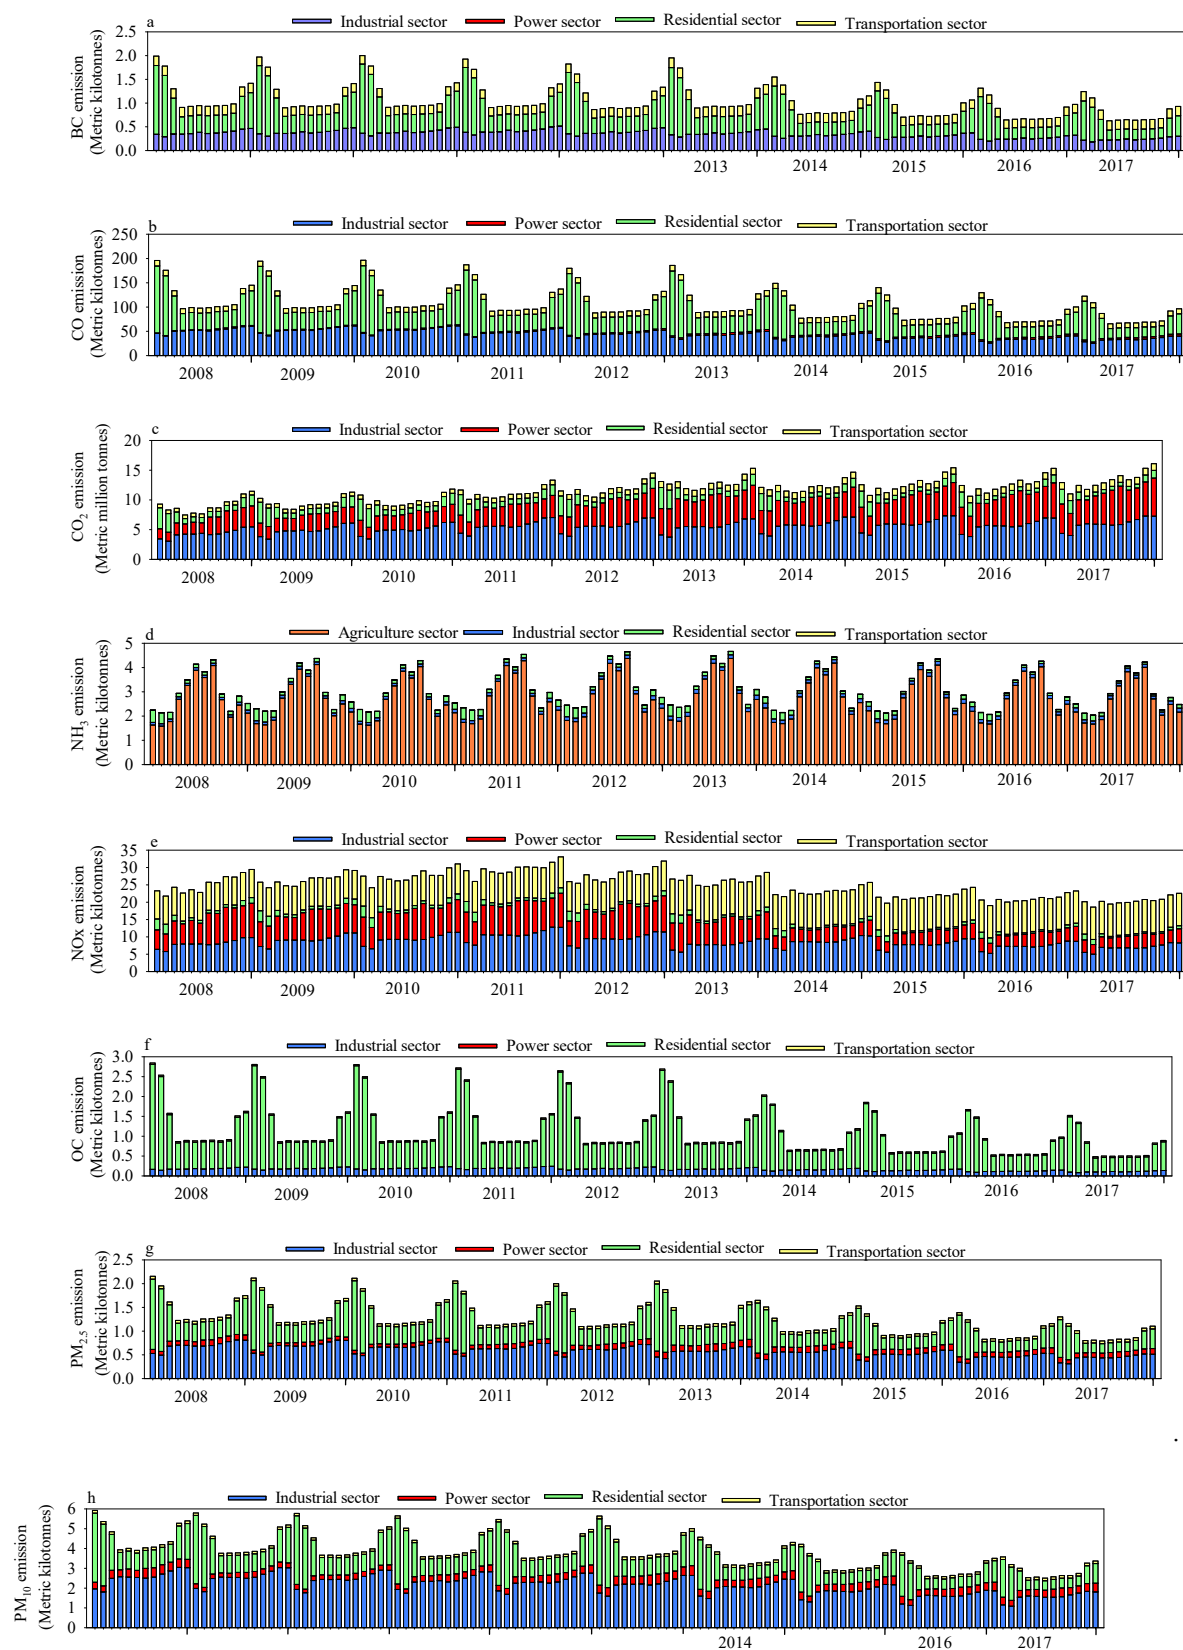

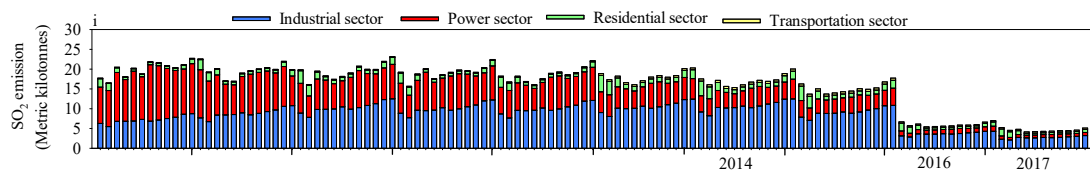

**Figure S3.** Monthly trends in emissions of air pollutants including BC by sector (a), CO by sector (b), NH<sub>3</sub> by sector (d), NO<sub>x</sub> by sector (e), OC by sector (f), PM<sub>2.5</sub> by sector (g), PM<sub>10</sub> by sector (h), SO<sub>2</sub> by sector (i), as well as CO<sub>2</sub> by sector (c) in Tianjin from the years of 2008-2017.

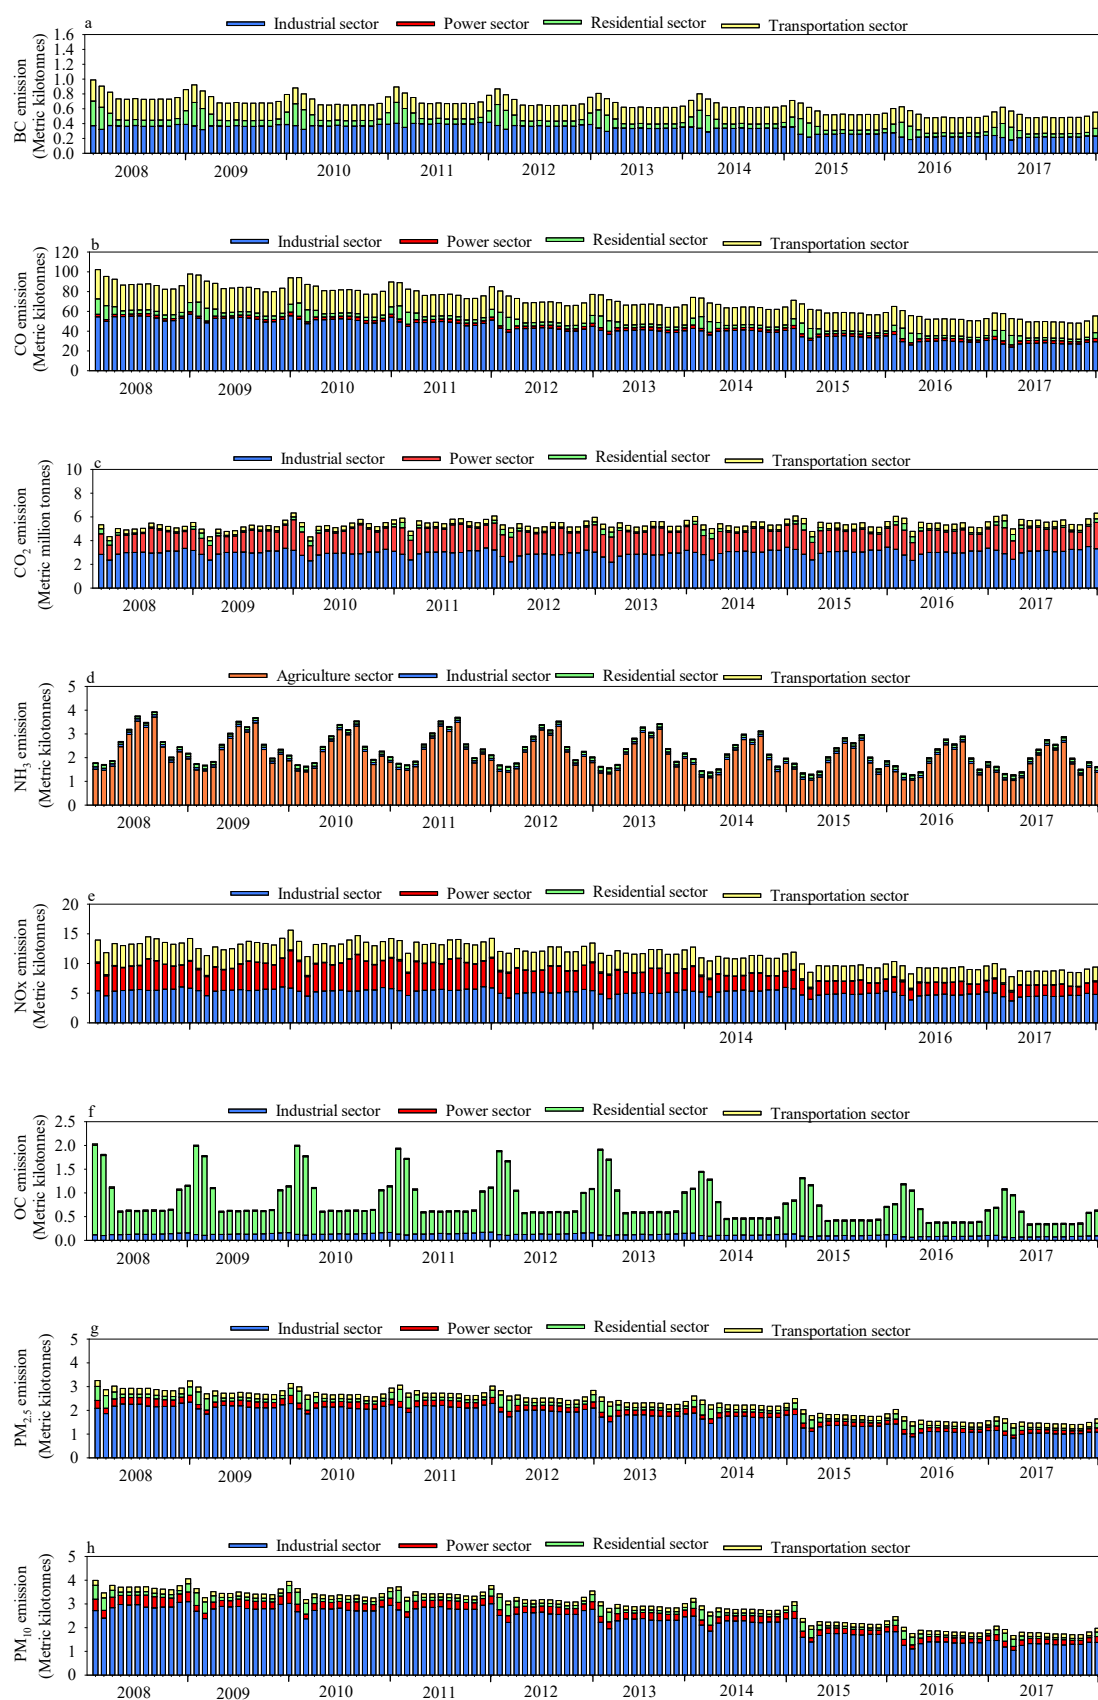



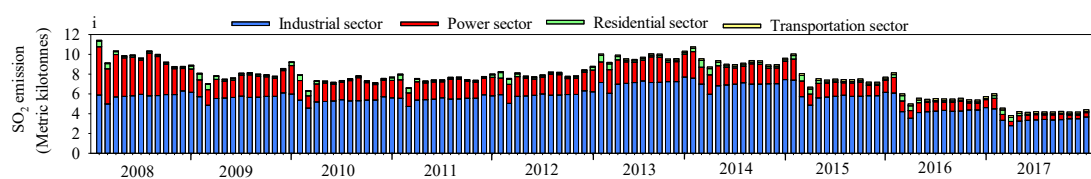

**Figure S4.** Monthly trends in emissions of air pollutants including BC by sector (a), CO by sector (b), NH<sub>3</sub> by sector (d), NO<sub>x</sub> by sector (e), OC by sector (f), PM<sub>2.5</sub> by sector (g), PM<sub>10</sub> by sector (h), SO<sub>2</sub> by sector (i), as well as CO<sub>2</sub> by sector (c) in Dalian from the years of 2008–2017.

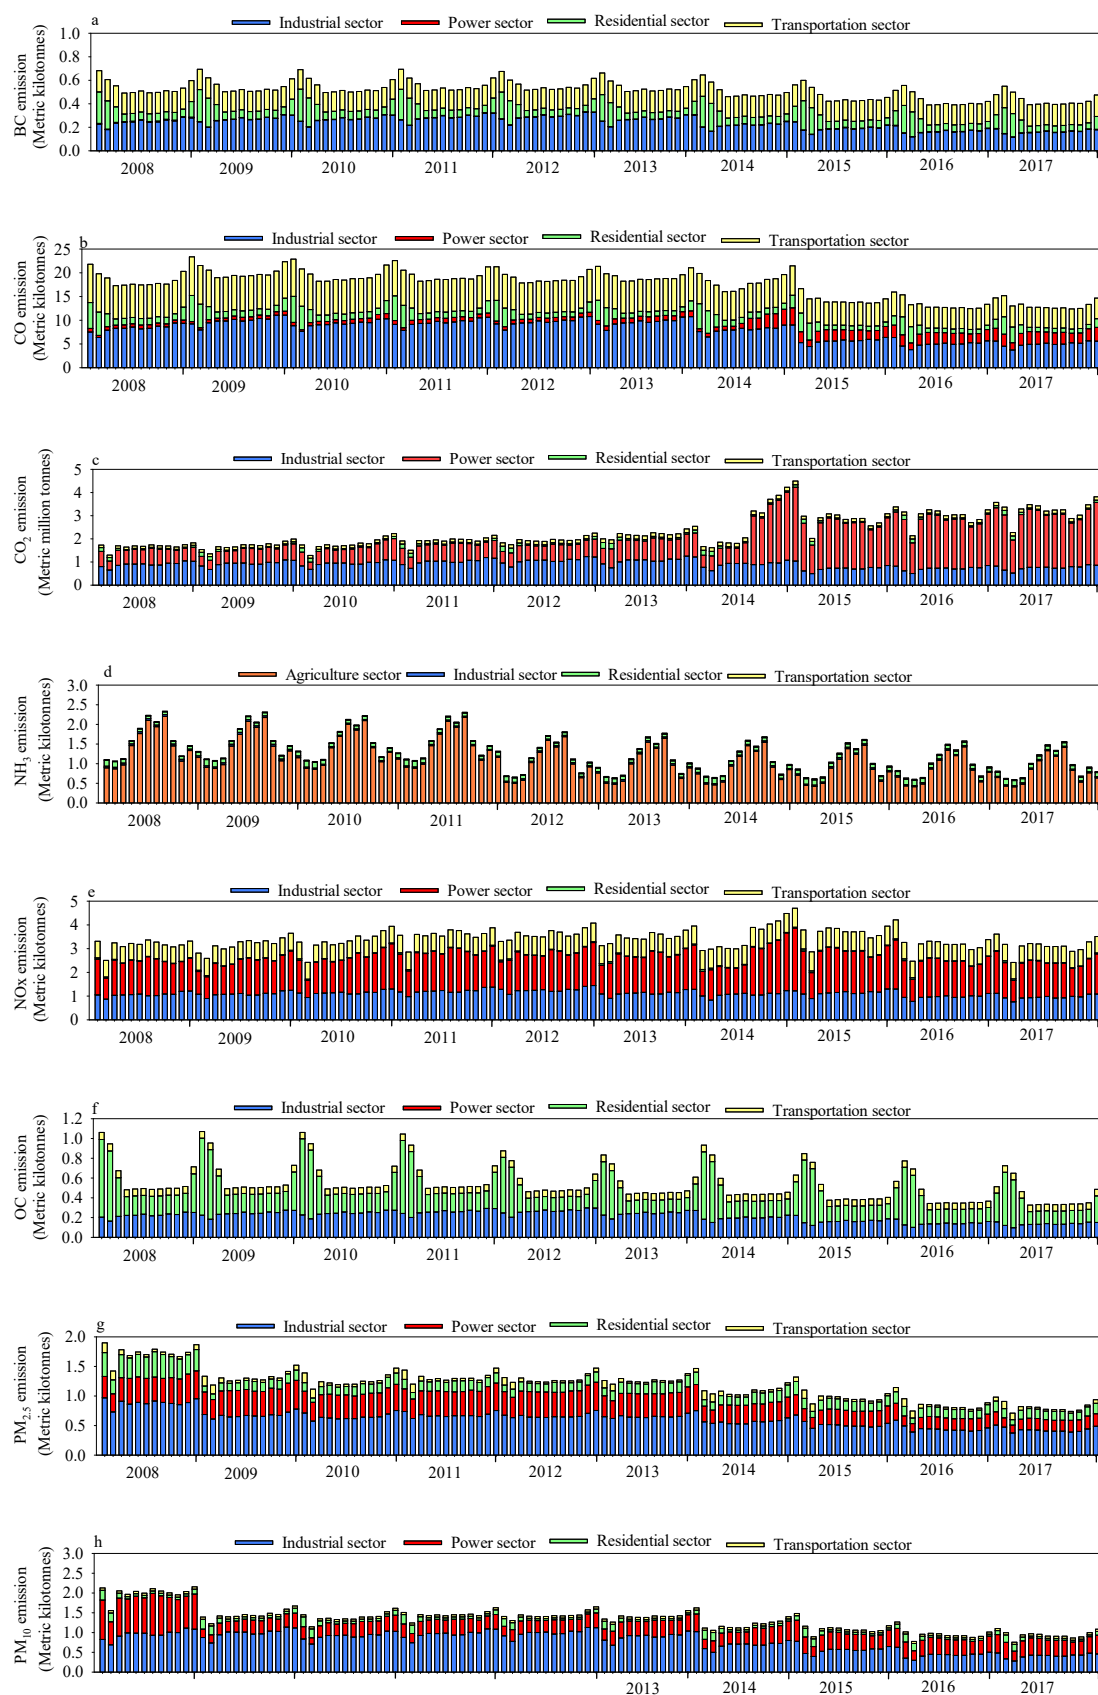

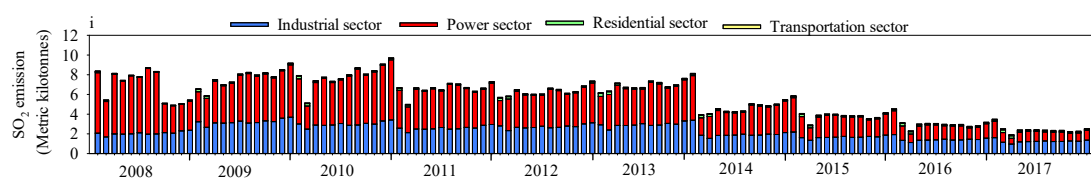

**Figure S5.** Monthly trends in emissions of air pollutants including BC by sector (a), CO by sector (b), NH<sub>3</sub> by sector (d), NO<sub>x</sub> by sector (e), OC by sector (f), PM<sub>2.5</sub> by sector (g), PM<sub>10</sub> by sector (h), SO<sub>2</sub> by sector (i), as well as CO<sub>2</sub> by sector (c) in Yingkou from the years of 2008–2017.

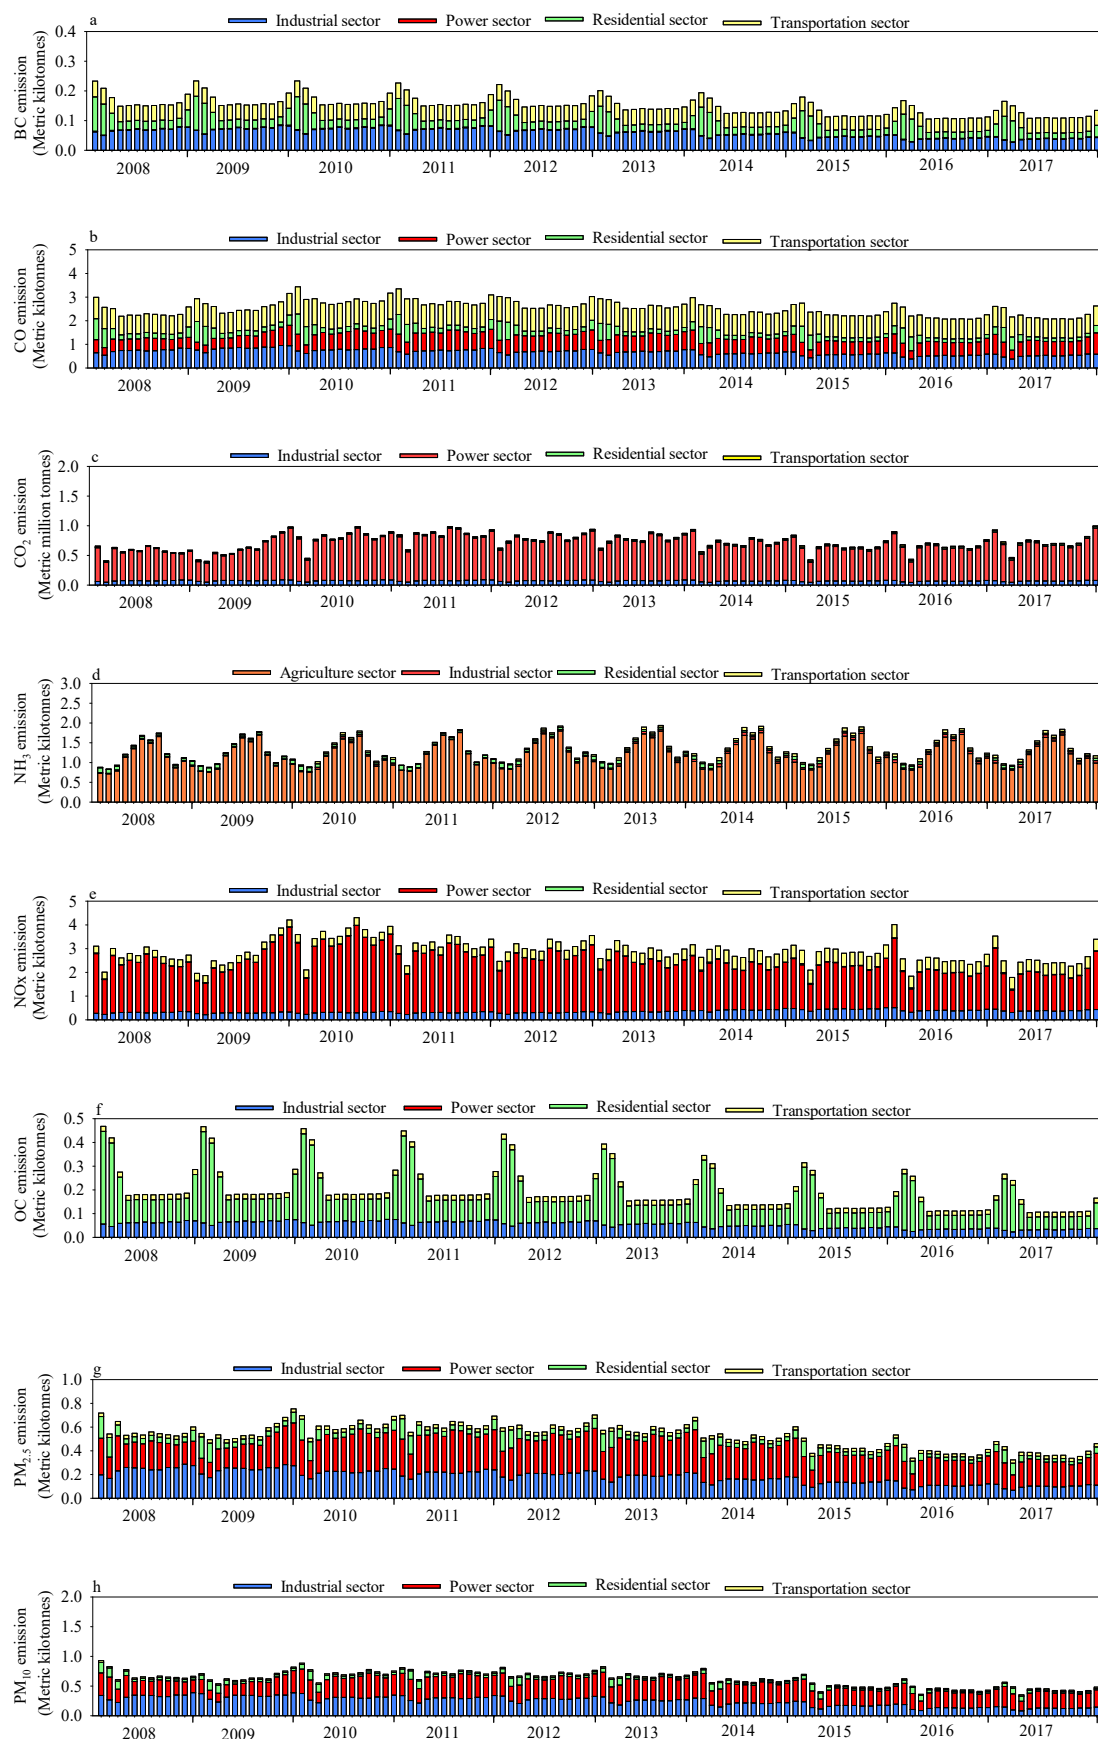

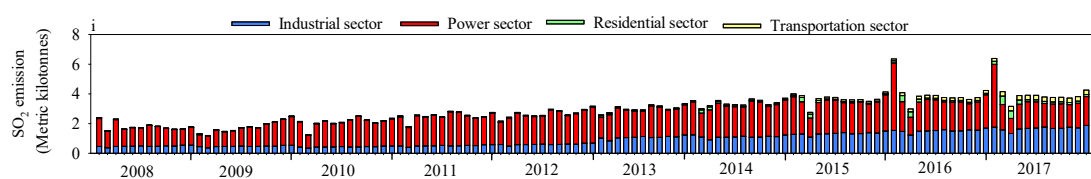

**Figure S6.** Monthly trends in emissions of air pollutants including BC by sector (a), CO by sector (b), NH<sub>3</sub> by sector (d), NO<sub>x</sub> by sector (e), OC by sector (f), PM<sub>2.5</sub> by sector (g), PM<sub>10</sub> by sector (h), SO<sub>2</sub> by sector (i), as well as CO<sub>2</sub> by sector (c) in Panjin from the years of 2008–2017.

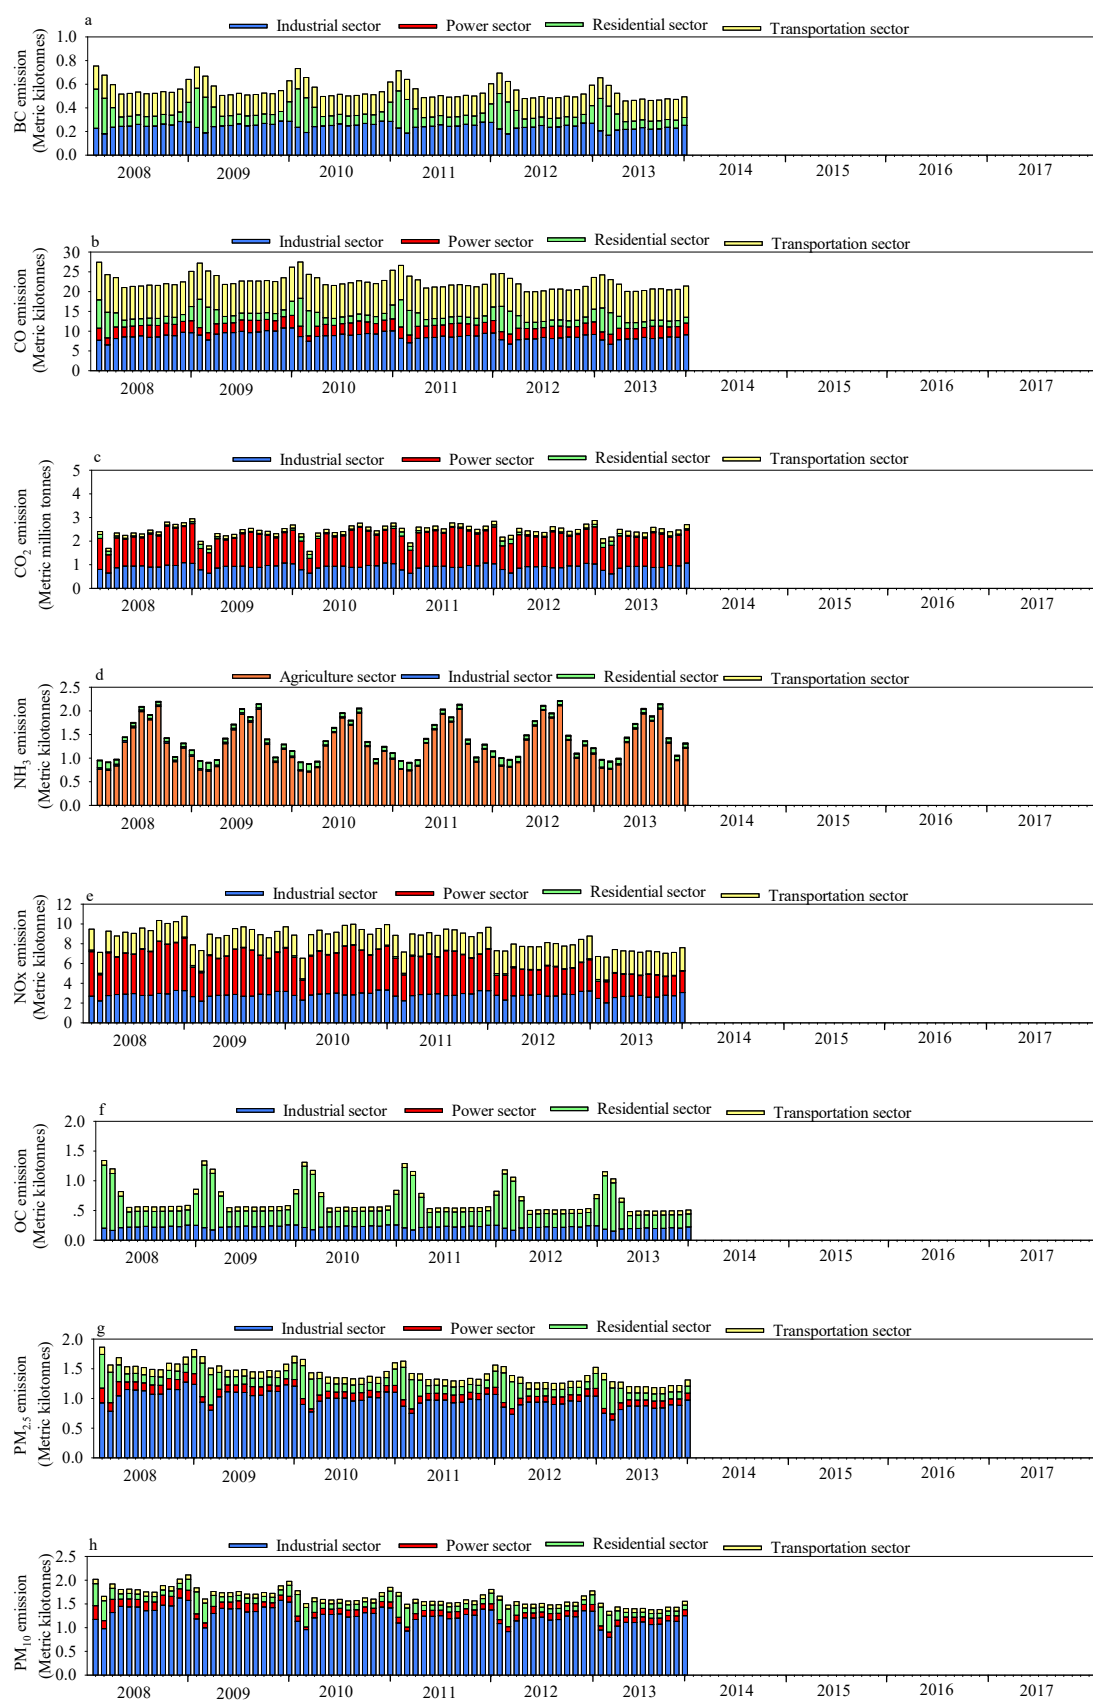

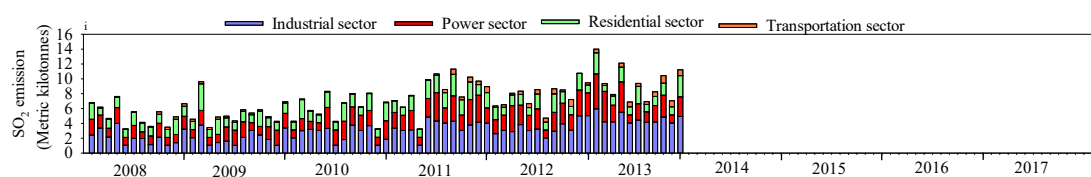

**Figure S7.** Monthly trends in emissions of air pollutants including BC by sector (a), CO by sector (b), NH<sub>3</sub> by sector (d), NO<sub>x</sub> by sector (e), OC by sector (f), PM<sub>2.5</sub> by sector (g), PM<sub>10</sub> by sector (h), SO<sub>2</sub> by sector (i), as well as CO<sub>2</sub> by sector (c) in Jinzhou from the years of 2008-2013.

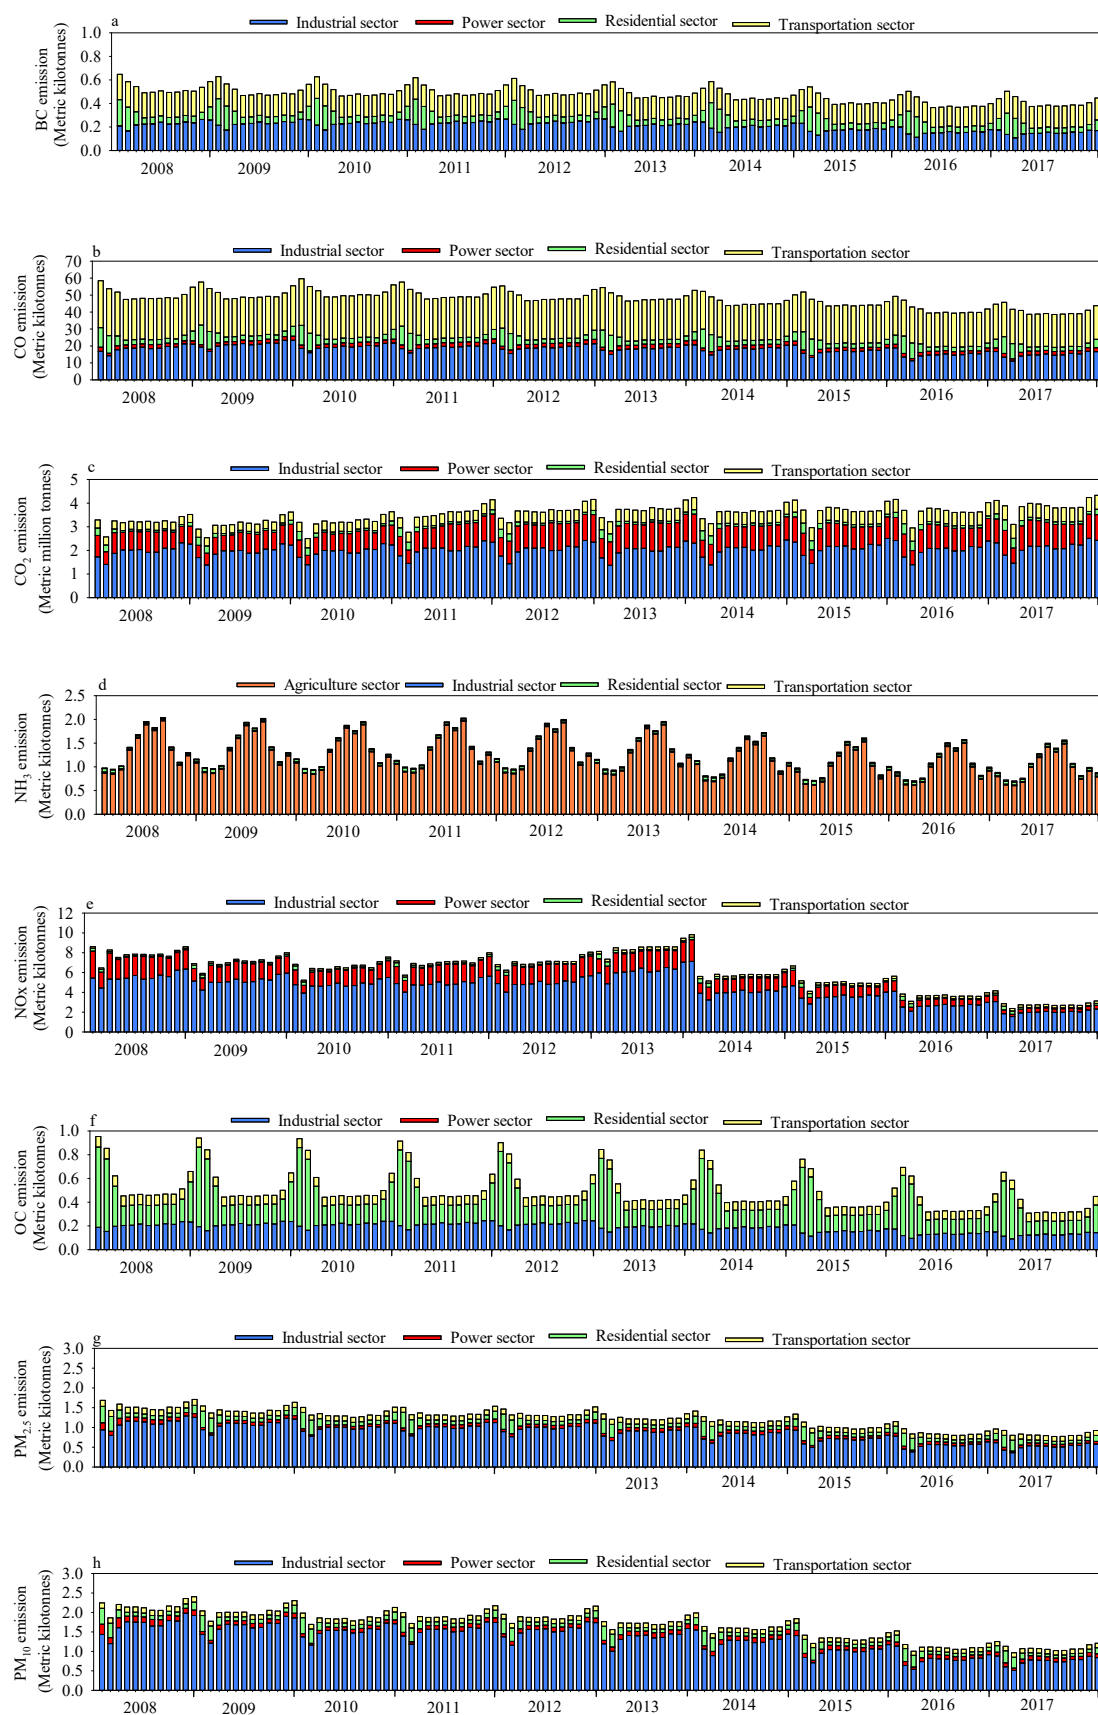



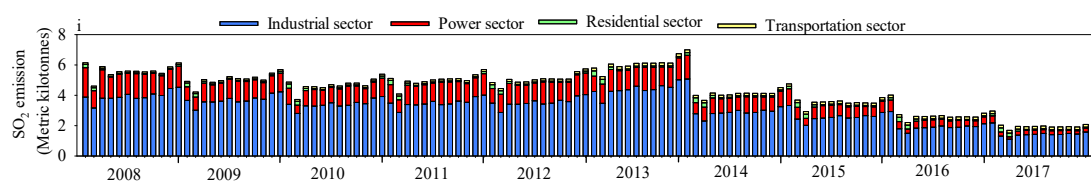

**Figure S8.** Monthly trends in emissions of air pollutants including BC by sector (a), CO by sector (b), NH<sub>3</sub> by sector (d), NO<sub>x</sub> by sector (e), OC by sector (f), PM<sub>2.5</sub> by sector (g), PM<sub>10</sub> by sector (h), SO<sub>2</sub> by sector (i), as well as CO<sub>2</sub> by sector (c) in Qinhuangdao from the years of 2008-2017.

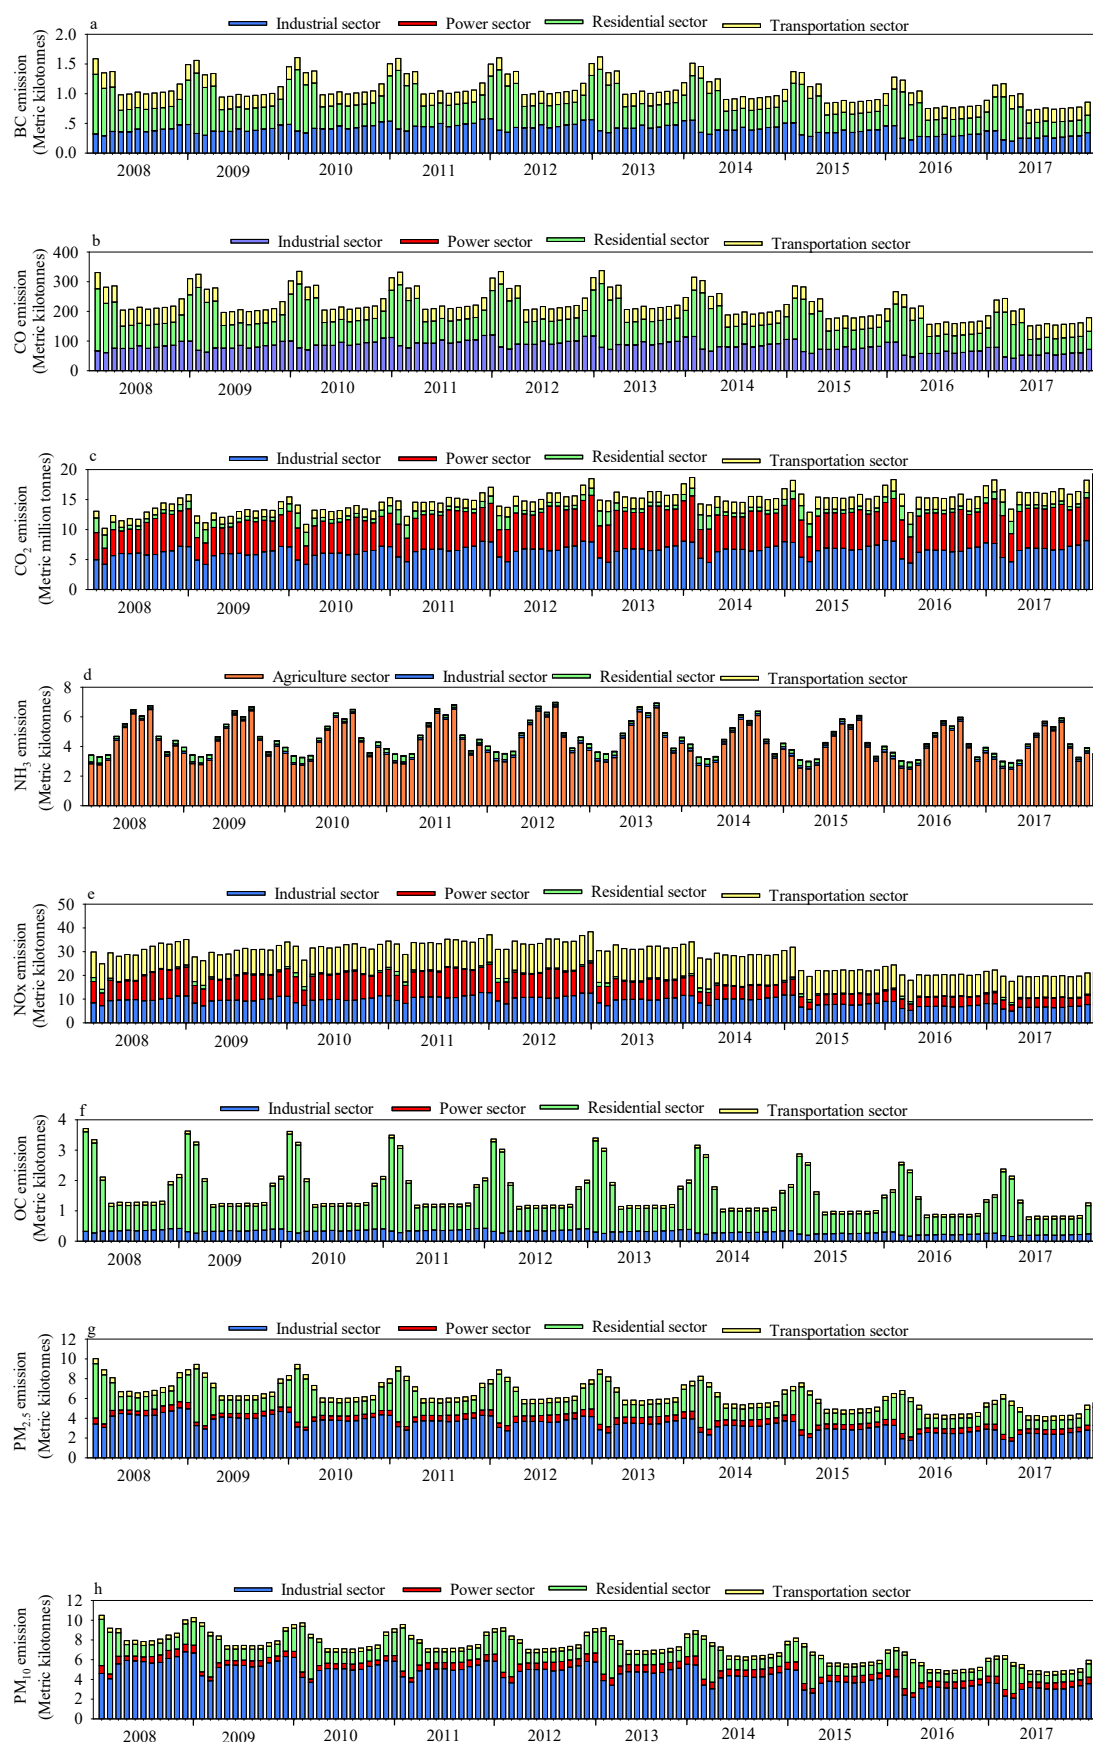

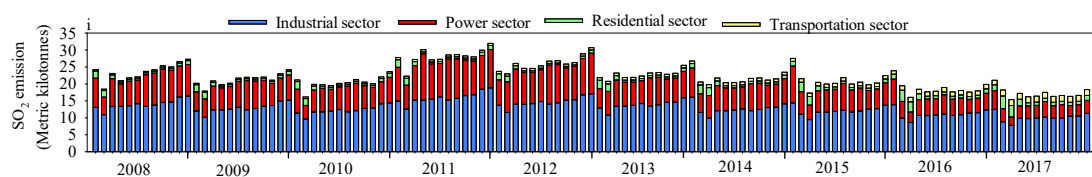

**Figure S9.** Monthly trends in emissions of air pollutants including BC by sector (a), CO by sector (b), NH<sub>3</sub> by sector (d), NO<sub>x</sub> by sector (e), OC by sector (f), PM<sub>2.5</sub> by sector (g), PM<sub>10</sub> by sector (h), SO<sub>2</sub> by sector (i), as well as CO<sub>2</sub> by sector (c) in Tangshan from the years of 2008-2017.

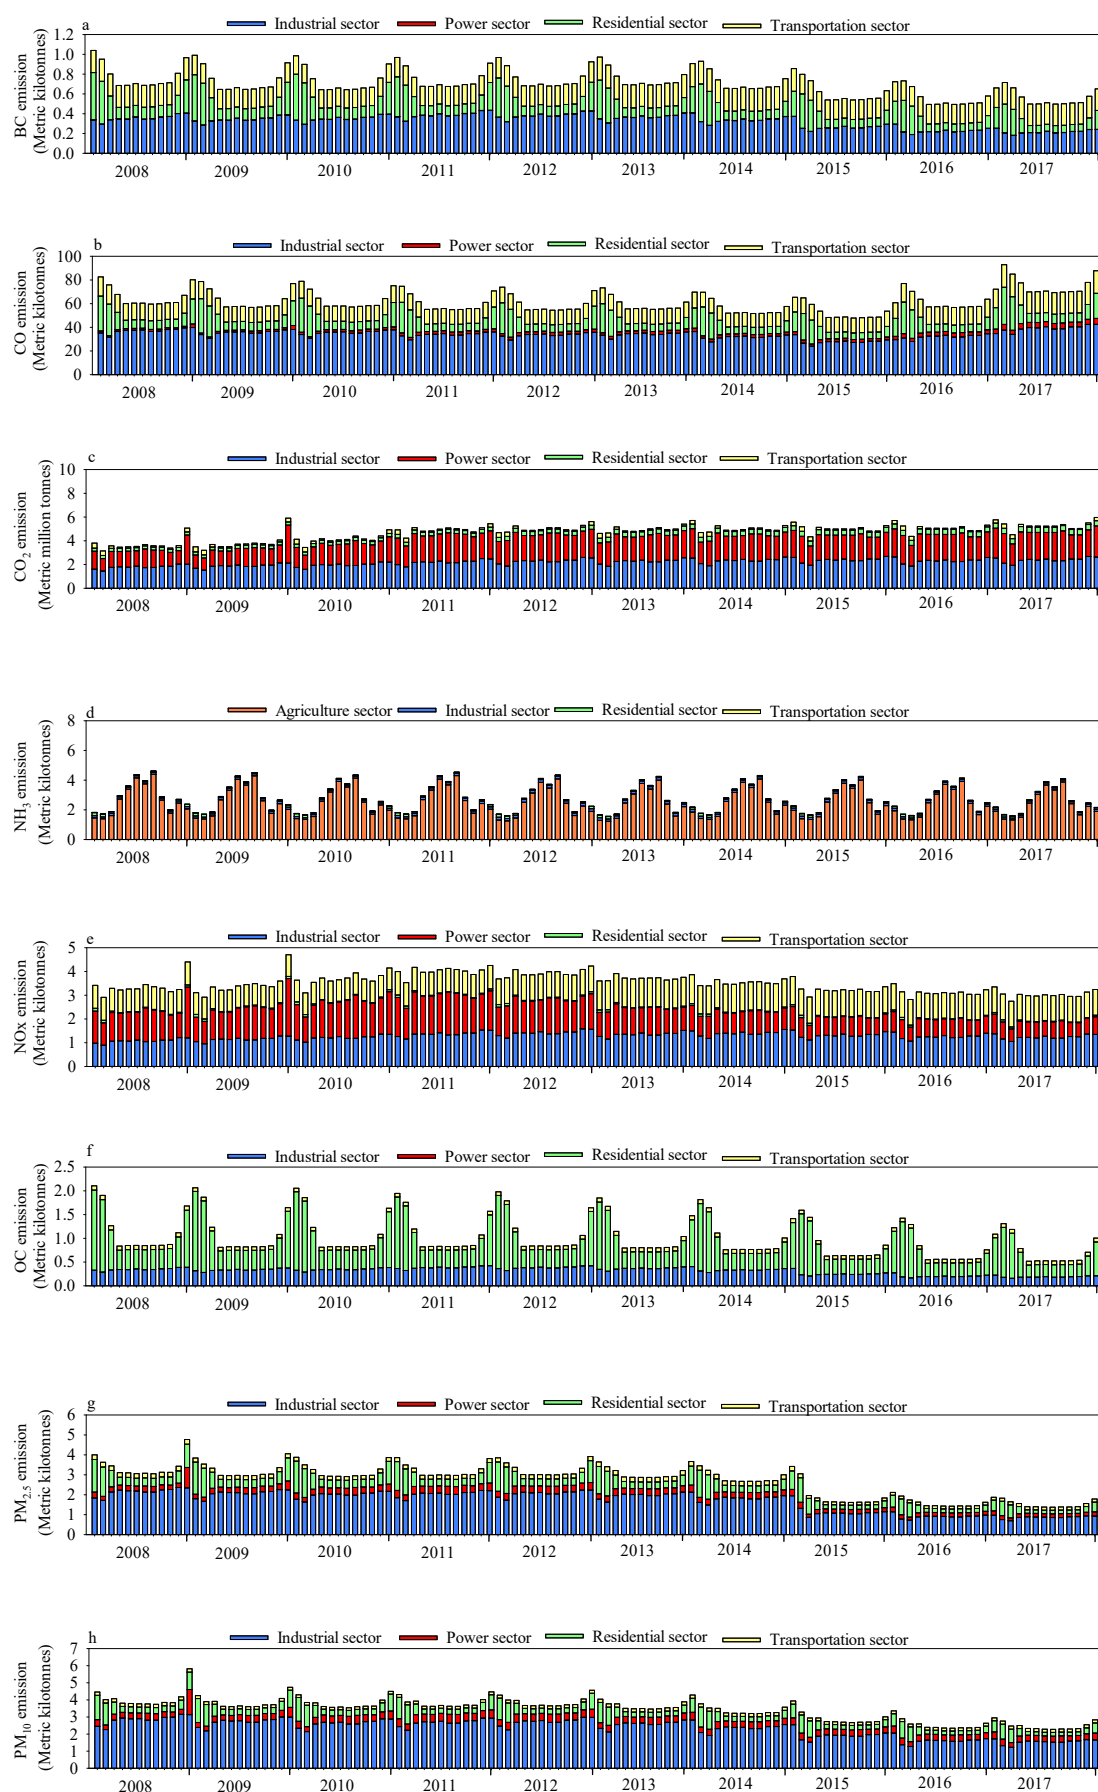

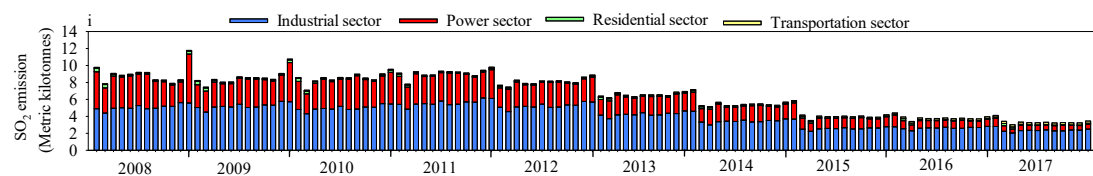

**Figure S10.** Monthly trends in emissions of air pollutants including BC by sector (a), CO by sector (b), NH<sub>3</sub> by sector (d), NO<sub>x</sub> by sector (e), OC by sector (f), PM<sub>2.5</sub> by sector (g), PM<sub>10</sub> by sector (h), SO<sub>2</sub> by sector (i), as well as CO<sub>2</sub> by sector (c) in Dongying from the years of 2008–2017.

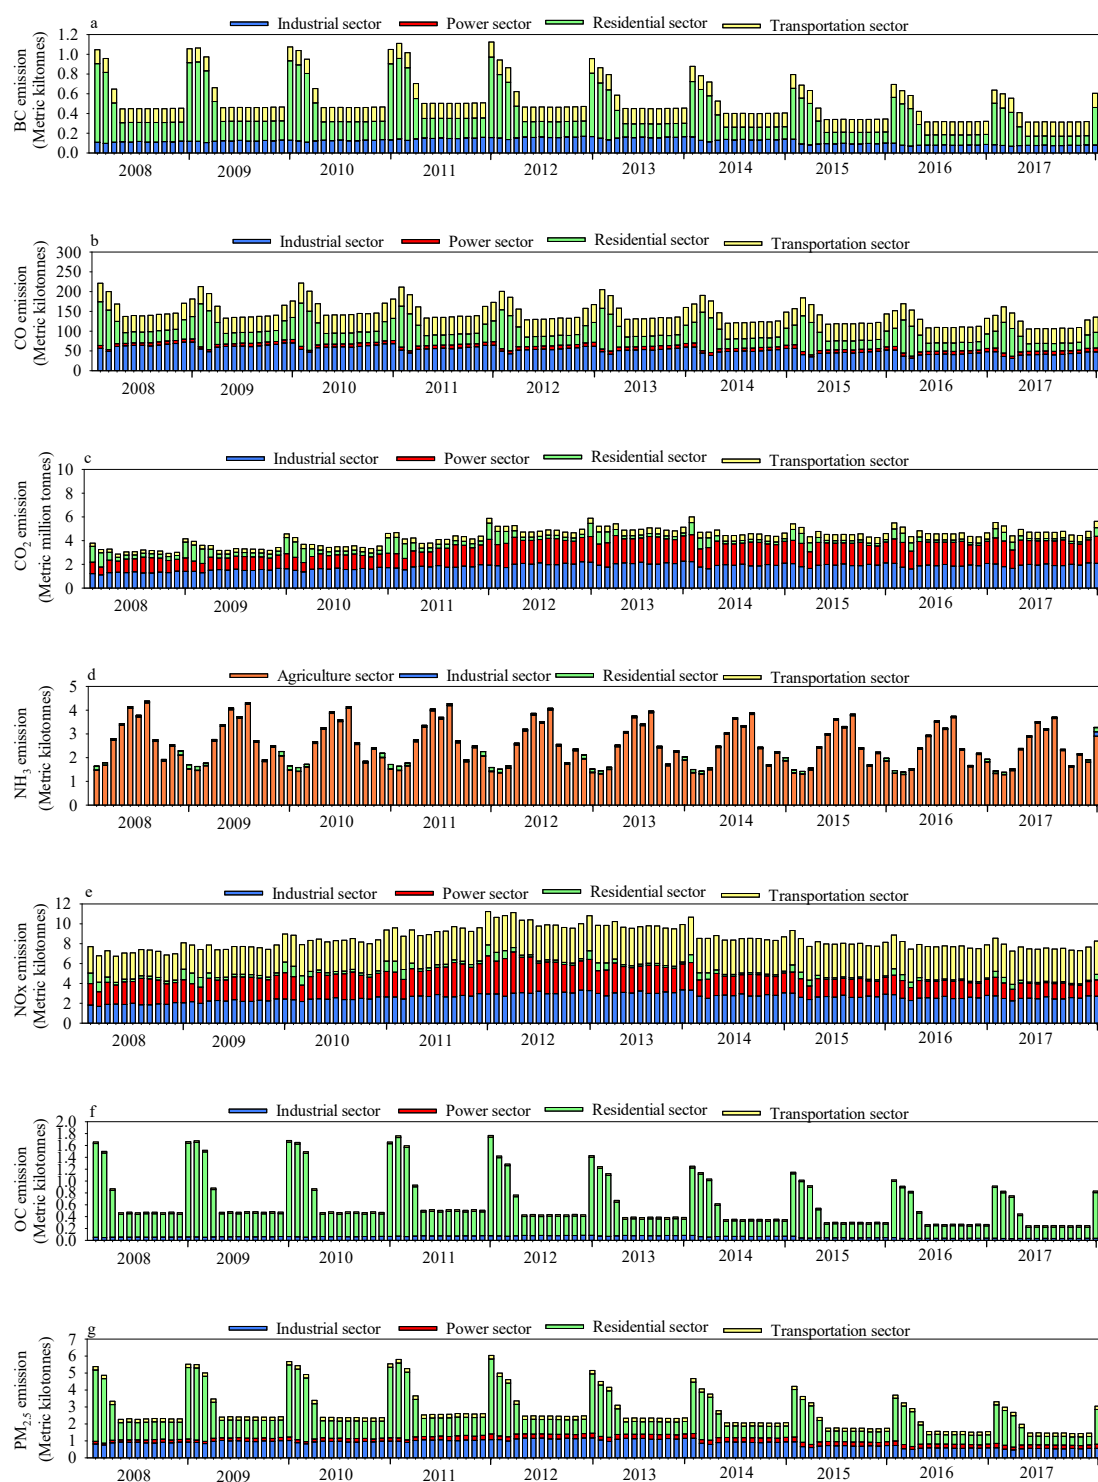

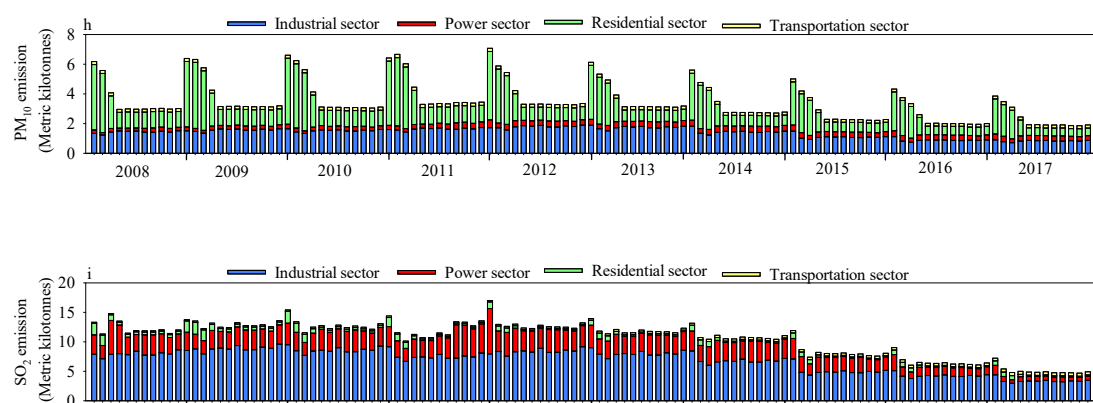

**Figure S11.** Monthly trends in emissions of air pollutants including BC by sector (a), CO by sector (b), NH<sub>3</sub> by sector (d), NO<sub>x</sub> by sector (e), OC by sector (f), PM<sub>2.5</sub> by sector (g), PM<sub>10</sub> by sector (h), SO<sub>2</sub> by sector (i), as well as CO<sub>2</sub> by sector (c) in Weifang from the years of 2008–2017.

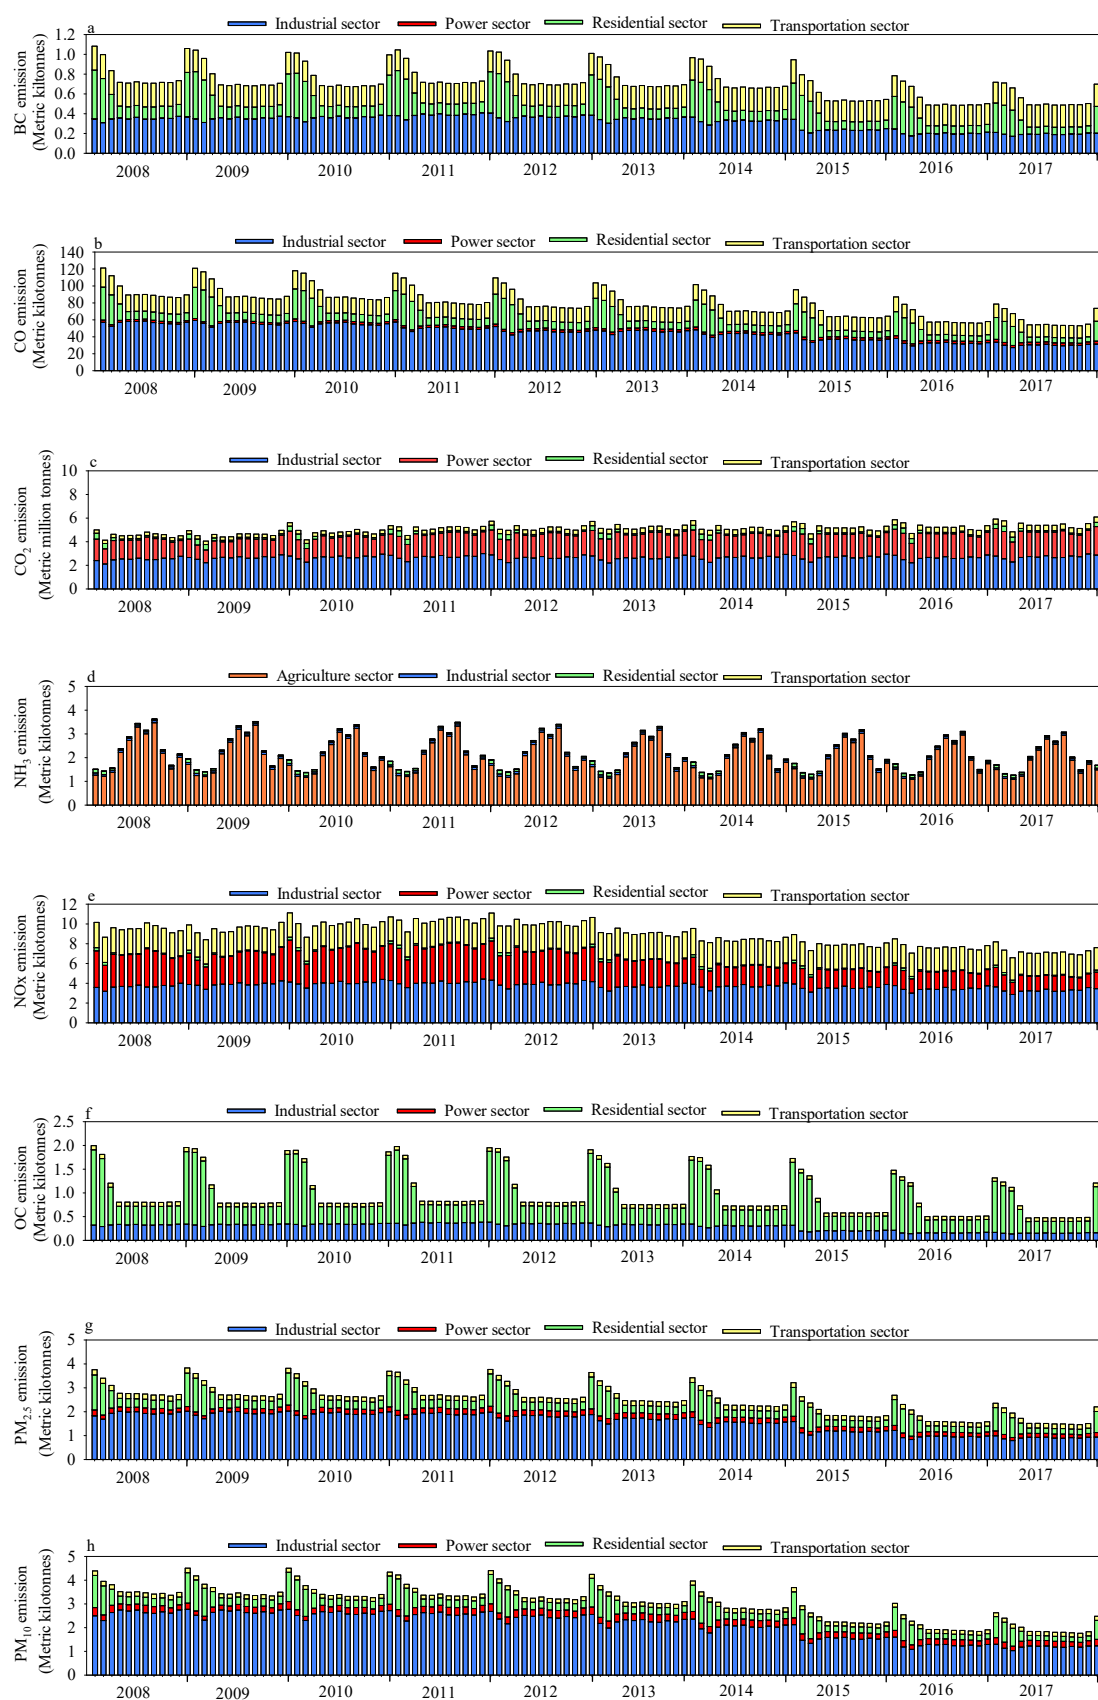



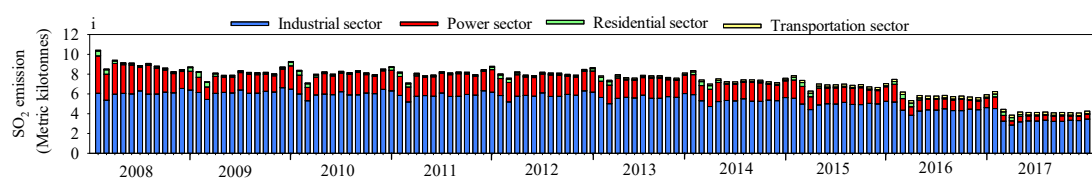

**Figure S12.** Monthly trends in emissions of air pollutants including BC by sector (a), CO by sector (b), NH<sub>3</sub> by sector (d), NO<sub>x</sub> by sector (e), OC by sector (f), PM<sub>2.5</sub> by sector (g), PM<sub>10</sub> by sector (h), SO<sub>2</sub> by sector (i), as well as CO<sub>2</sub> by sector (c) in Yantai from the years of 2008-2017.

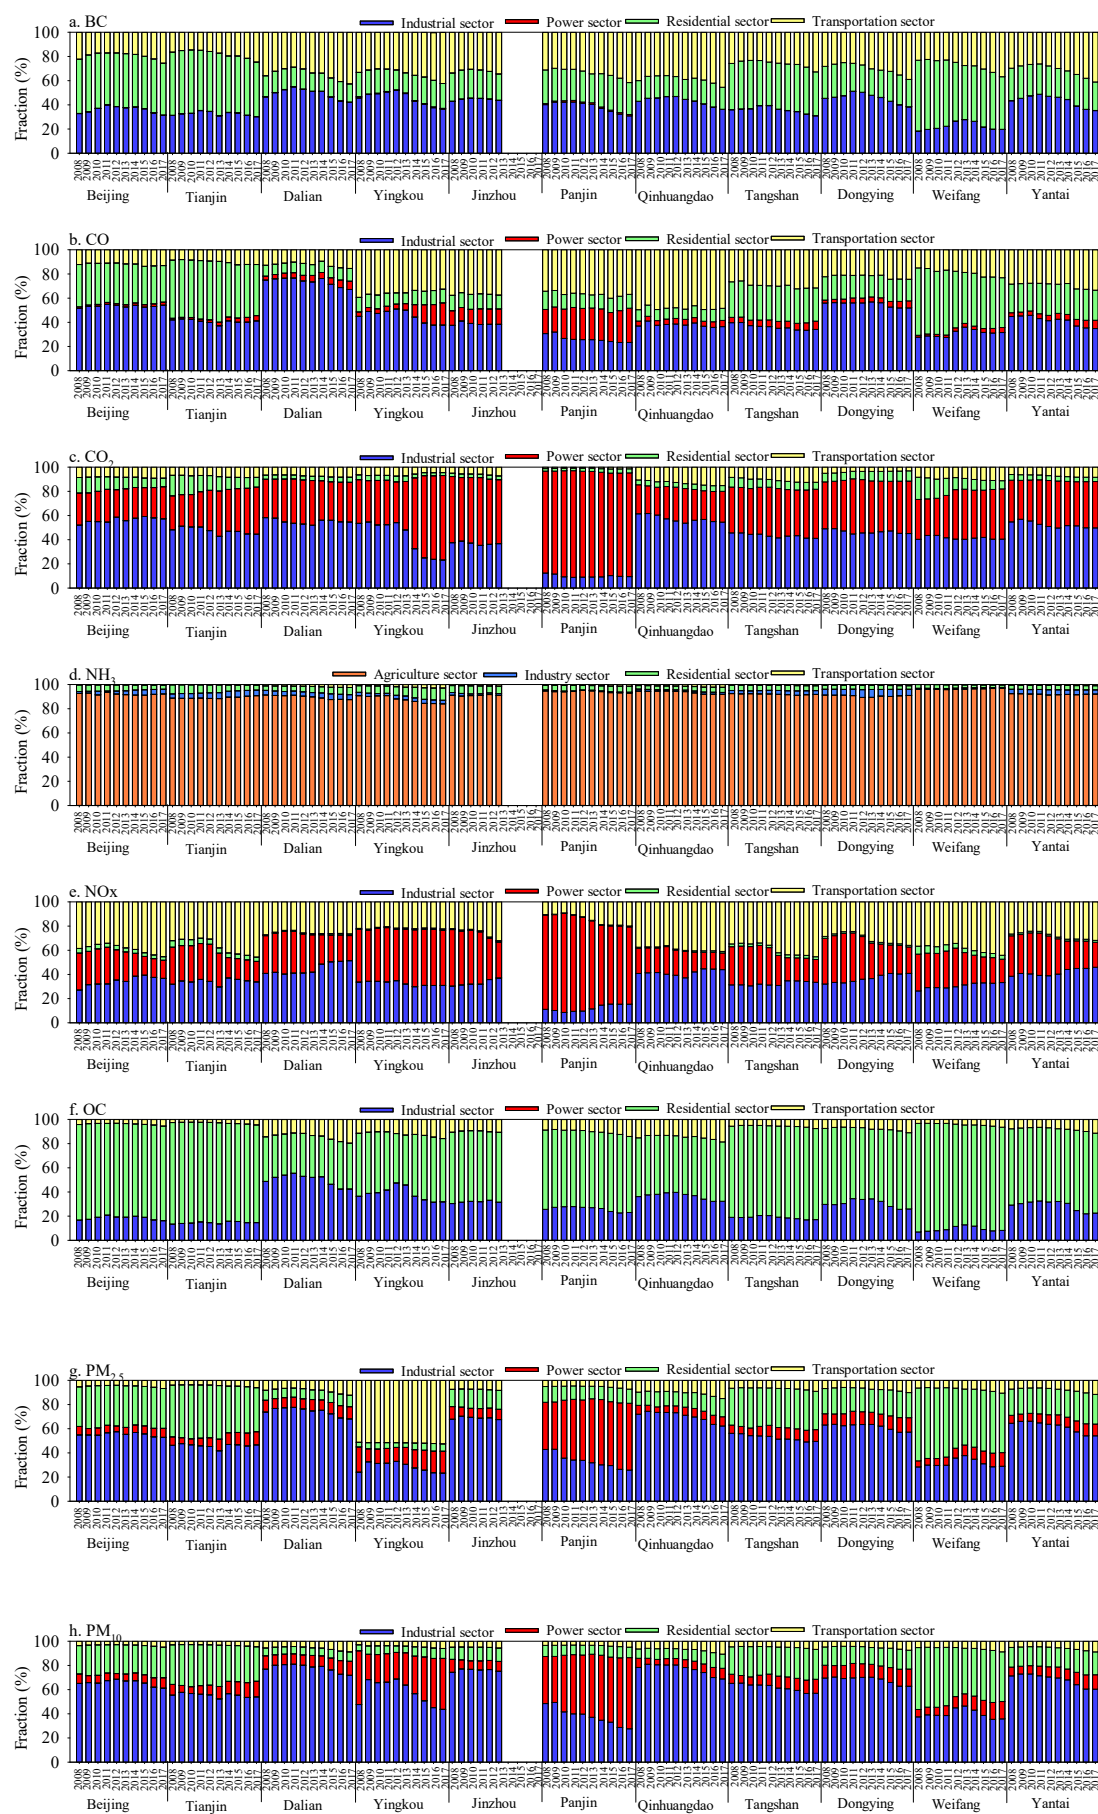

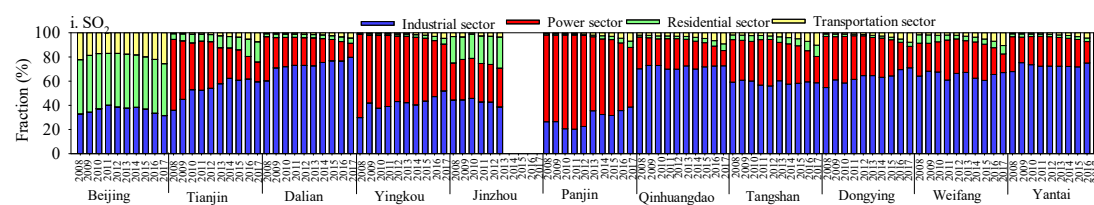

**Figure S13.** Contribution of the different sectors to the yearly air pollutants including BC (a), CO (b),  $\text{NH}_3$  (d),  $\text{NO}_x$  (e), OC (f),  $\text{PM}_{2.5}$  (g),  $\text{PM}_{10}$  (h),  $\text{SO}_2$  (i), as well as  $\text{CO}_2$  (c) in the eleven cities from the years of 2008–2017.

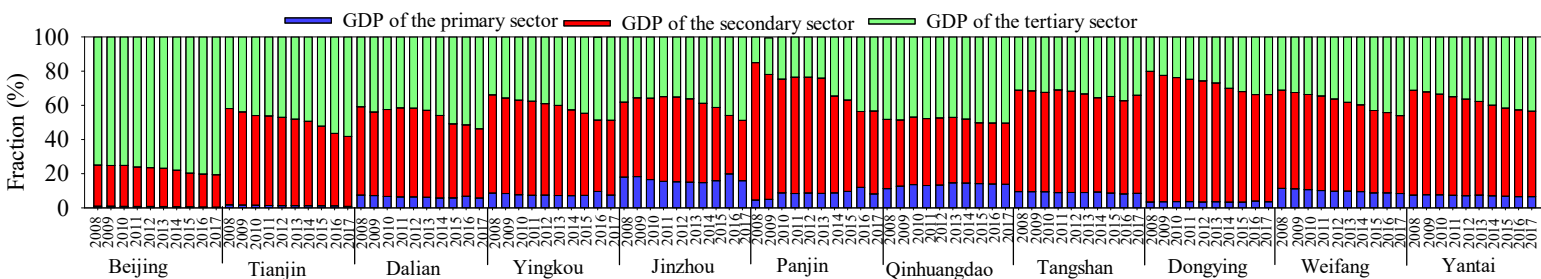

**Figure S14.** Contributions of the primary sector (agriculture), the secondary sector (industry), and the tertiary sector (excluding agriculture and industry) to GDP from 2008 to 2017 in the 11 cities.

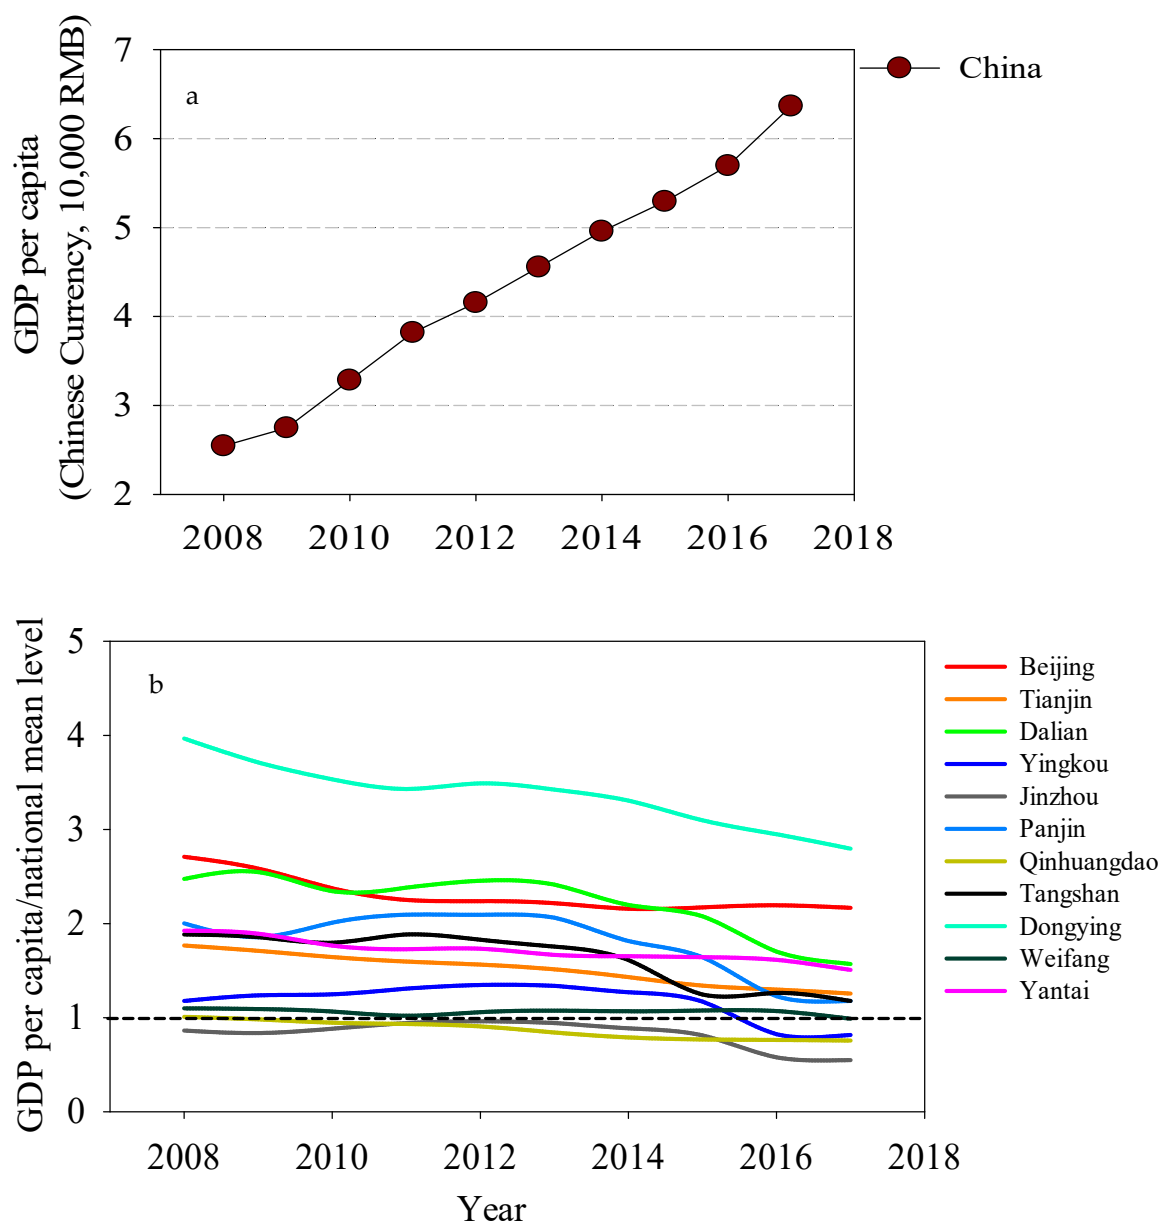

**Figure S15.** (a) Changes in GDP per capita from 2008 to 2017 in China. (b) Changes in ratio of GDP per capita and national mean level from 2008 to 2017 in 11 cities. Ratio of GDP per capita and national mean level was estimated using GDP per capita for each city divided GDP per capita in China.
